# Supplementary material
Source: PubMed Central journal article supplement (PMC9444913)
Supplement: NIHMS1817510-supplement-6.pdf [file NIHMS1817510-supplement-6.pdf]

**Table S1.** Fasting concentrations of all serum proteins at week 24

| Analyte                  | Control                 | Obese                    | LFD                      | LFCR                     | MCR                      | ICR                     |
|--------------------------|-------------------------|--------------------------|--------------------------|--------------------------|--------------------------|-------------------------|
| Leptin (ng/ml)           | 3.3 (3.3) <sup>a</sup>  | 73 (43) <sup>b</sup>     | 10 (6.0) <sup>a</sup>    | 5.6 (3.3) <sup>a</sup>   | 7.8 (3.5) <sup>a</sup>   | 7.8 (5.5) <sup>a</sup>  |
| Adiponectin (μg/ml)      | 16.1 (3.3) <sup>a</sup> | 17.5 (3.7) <sup>ab</sup> | 18.7 (5.7) <sup>ab</sup> | 21.6 (4.5) <sup>ab</sup> | 23.0 (7.2) <sup>ab</sup> | 24.9 (3.1) <sup>b</sup> |
| Insulin (ng/ml)          | 5.0 (2.9) <sup>a</sup>  | 13.3 (8.3) <sup>b</sup>  | 6.5 (1.7) <sup>a</sup>   | 7.5 (5.5) <sup>ab</sup>  | 4.9 (2.4) <sup>a</sup>   | 5.7 (3.1) <sup>a</sup>  |
| PAI-1 (ng/ml)            | 2.6 (1.2) <sup>a</sup>  | 4.0 (0.9) <sup>b</sup>   | 3.3 (0.7) <sup>ab</sup>  | 3.7 (0.6) <sup>ab</sup>  | 3.2 (0.6) <sup>ab</sup>  | 3.6 (0.6) <sup>ab</sup> |
| Resistin (ng/ml)         | 290 (163) <sup>ab</sup> | 399 (120) <sup>a</sup>   | 271 (109) <sup>ab</sup>  | 248 (47) <sup>ab</sup>   | 241 (84) <sup>b</sup>    | 236 (82) <sup>b</sup>   |
| IGF-1 (ng/ml)            | 63.9 (20) <sup>ac</sup> | 98.0 (36) <sup>b</sup>   | 89.6 (17) <sup>bc</sup>  | 45.4 (11) <sup>a</sup>   | 44.1 (13) <sup>a</sup>   | 39.5 (4.8) <sup>a</sup> |
| Ghrelin (ng/ml)          | 17.0 (15)               | 12.9 (4.6)               | 21.6 (4.5)               | 18.9 (15)                | 20.5 (10)                | 27.3 (16)               |
| GIP (pg/ml)              | 505 (239) <sup>a</sup>  | 828 (126) <sup>b</sup>   | 654 (113) <sup>ab</sup>  | 563 (40) <sup>a</sup>    | 569 (92) <sup>a</sup>    | 571 (205) <sup>a</sup>  |
| GLP-1 (pg/ml)            | 141 (85)                | 174 (124)                | 76 (26)                  | 172 (62)                 | 141 (85)                 | 147 (74)                |
| Glucagon (ng/ml)         | 370 (207)               | 553 (322)                | 369 (215)                | 419 (182)                | 394 (218)                | 433 (337)               |
| GM-CSF (pg/ml)           | 492 (75)                | 453 (72)                 | 471 (140)                | 358 (74)                 | 407 (76)                 | 429 (76)                |
| IL-1β (pg/ml)            | 1.2 (0.2) <sup>ab</sup> | 1.6 (0.4) <sup>bc</sup>  | 1.7 (0.4) <sup>b</sup>   | 1.1 (0.2) <sup>a</sup>   | 1.2 (0.2) <sup>ab</sup>  | 1.2 (0.2) <sup>ac</sup> |
| IL-6 (pg/ml)             | 41 (19) <sup>a</sup>    | 103 (39) <sup>bc</sup>   | 108 (44) <sup>b</sup>    | 47 (17) <sup>a</sup>     | 49 (21) <sup>a</sup>     | 55 (21) <sup>ac</sup>   |
| IL-10 (ng/ml)            | 455 (108)               | 432 (216)                | 505 (109)                | 350 (65)                 | 344 (88)                 | 364 (104)               |
| IL-17A (ng/ml)           | 376 (295)               | 394 (283)                | 493 (353)                | 303 (199)                | 261 (45)                 | 318 (208)               |
| IFN <sub>γ</sub> (pg/ml) | 86.7 (46)               | 121 (56)                 | 115 (72)                 | 80.6 (39)                | 83.7 (39)                | 87.1 (38)               |
| MCP-1 (ng/ml)            | 1.6 (0.4)               | 1.8 (0.4)                | 1.7 (0.5)                | 1.4 (0.4)                | 1.7 (0.4)                | 1.7 (0.4)               |
| TGFβ (ng/ml)             | 116 (16) <sup>a</sup>   | 181 (39) <sup>b</sup>    | 167 (32) <sup>b</sup>    | 120 (28) <sup>a</sup>    | 118 (31) <sup>a</sup>    | 124 (14) <sup>a</sup>   |
| TNFα (ng/ml)             | 7.5 (3.3) <sup>a</sup>  | 17.4 (4.8) <sup>b</sup>  | 15.2 (6.4) <sup>b</sup>  | 6.2 (2.4) <sup>a</sup>   | 7.0 (3.3) <sup>a</sup>   | 7.8 (3.0) <sup>a</sup>  |

Multiplex immunoassay analyses were performed on serum collected by submandibular bleed after a 4-6 hr fast, one week prior to tumor injections and nine weeks after the diet switch (n=5-8 samples/group). Standard deviations are shown in parentheses. Abbreviations: GIP, gastric inhibitory polypeptide; GLP-1, glucagon-like peptide-1; GM-CSF, granulocyte-macrophage colony-stimulating factor; ICR, intermittent calorie restricted; IGF-1, insulin-like growth factor; IL-1β, interleukin 1 beta; IL-6, interleukin 6; IL-10, interleukin 10; IL-17A, interleukin 17A; IFN<sub>γ</sub>, interferon gamma; LFCR, low-fat calorie-restricted; LFD, low-fat diet; MCP-1, macrophage chemoattractant protein-1; MCR, Mediterranean-style calorie restricted; PAI-1, plasminogen activator inhibitor-1; TGFβ, transforming growth factor beta; TNFα, tumor necrosis factor alpha. Different letters indicate significant differences, *P*<0.05.
