# Supplementary material
Source: PubMed Central journal article supplement (PMC9444913)
Supplement: NIHMS1817510-supplement-7.pdf [file NIHMS1817510-supplement-7.pdf]

**Table S2.** Significantly enriched transcription factor binding motifs at the differentially methylated regions for the obese versus MCR and obese versus nonrestrictive LFD comparisons

| <b>Obese versus MCR</b>                                     |              |             |
|-------------------------------------------------------------|--------------|-------------|
| <b>Motif name</b>                                           | <b>q-val</b> | <b>% TS</b> |
| Elk4(ETS)/Hela-Elk4-ChIPSeq(GSE31477)                       | 0            | 14.5        |
| NF1(CTF)/LNCAP-NF1-ChIP-Seq(Unpublished)                    | 0            | 9.52        |
| ZNF711(Zf)/SHSY5Y-ZNF711-ChIP-Seq(GSE20673)                 | 0            | 35.9        |
| NF1-halfsite(CTF)/LNCaP-NF1-ChIP-Seq(Unpublished)           | 0            | 27.5        |
| HIC1(Zf)/Treg-ZBTB29-ChIP-Seq(GSE99889)                     | 0            | 36.1        |
| BHLHA15(bHLH)/NIH3T3-BHLHB8.HA-ChIP-Seq(GSE119782)          | 0            | 21.3        |
| Elk1(ETS)/Hela-Elk1-ChIP-Seq(GSE31477)                      | 0            | 13.2        |
| NeuroG2(bHLH)/Fibroblast-NeuroG2-ChIP-Seq(GSE75910)         | 0            | 21.5        |
| Stat3(Stat)/mES-Stat3-ChIP-Seq(GSE11431)                    | 0            | 7.69        |
| ELF1(ETS)/Jurkat-ELF1-ChIP-Seq(SRA014231)                   | 0            | 11.5        |
| Twist2(bHLH)/Myoblast-Twist2.Ty1-ChIP-Seq(GSE127998)        | 0            | 25.3        |
| EAR2(NR)/K562-NR2F6-ChIP-Seq(Encode)                        | 0            | 17.6        |
| Atoh1(bHLH)/Cerebellum-Atoh1-ChIP-Seq(GSE22111)             | 0            | 17.6        |
| NeuroD1(bHLH)/Islet-NeuroD1-ChIP-Seq(GSE30298)              | 0            | 12.9        |
| TEAD1(TEAD)/HepG2-TEAD1-ChIP-Seq(Encode)                    | 0            | 8.83        |
| ZFX(Zf)/mES-Zfx-ChIP-Seq(GSE11431)                          | 0            | 23.4        |
| COUP-TFII(NR)/K562-NR2F1-ChIP-Seq(Encode)                   | 0            | 18.4        |
| TEAD4(TEA)/Tropoblast-Tead4-ChIP-Seq(GSE37350)              | 0            | 8.73        |
| TCF4(bHLH)/SHSY5Y-TCF4-ChIP-Seq(GSE96915)                   | 0            | 20.9        |
| Tcf21(bHLH)/ArterySmoothMuscle-Tcf21-ChIP-Seq(GSE61369)     | 0            | 15.8        |
| Foxa3(Forkhead)/Liver-Foxa3-ChIP-Seq(GSE77670)              | 0            | 2.18        |
| Erra(NR)/HepG2-Erra-ChIP-Seq(GSE31477)                      | 0            | 30.3        |
| Olig2(bHLH)/Neuron-Olig2-ChIP-Seq(GSE30882)                 | 0            | 23.4        |
| Ap4(bHLH)/AML-Tfap4-ChIP-Seq(GSE45738)                      | 0            | 19.4        |
| FoxL2(Forkhead)/Ovary-FoxL2-ChIP-Seq(GSE60858)              | 0            | 4.24        |
| FOXA1(Forkhead)/MCF7-FOXA1-ChIP-Seq(GSE26831)               | 0            | 5.02        |
| TEAD3(TEA)/HepG2-TEAD3-ChIP-Seq(Encode)                     | 0            | 10.1        |
| SCL(bHLH)/HPC7-Scl-ChIP-Seq(GSE13511)                       | 0            | 59.4        |
| EBF1(EBF)/Near-E2A-ChIP-Seq(GSE21512)                       | 0            | 18.6        |
| ETV4(ETS)/HepG2-ETV4-ChIP-Seq(ENCODE)                       | 0            | 19.6        |
| Tcf12(bHLH)/GM12878-Tcf12-ChIP-Seq(GSE32465)                | 0            | 17.3        |
| Ptf1a(bHLH)/Panc1-Ptf1a-ChIP-Seq(GSE47459)                  | 0            | 39.5        |
| MyoG(bHLH)/C2C12-MyoG-ChIP-Seq(GSE36024)                    | 0            | 18.6        |
| FOXA1(Forkhead)/LNCAP-FOXA1-ChIP-Seq(GSE27824)              | 0            | 6.23        |
| GABPA(ETS)/Jurkat-GABPa-ChIP-Seq(GSE17954)                  | 0            | 14.2        |
| AR-halfsite(NR)/LNCaP-AR-ChIP-Seq(GSE27824)                 | 0            | 46.2        |
| EBF2(EBF)/BrownAdipose-EBF2-ChIP-Seq(GSE97114)              | 0            | 13.5        |
| Hoxc9(Homeobox)/Ainv15-Hoxc9-ChIP-Seq(GSE21812)             | 0            | 2.96        |
| COUP-TFII(NR)/Artia-Nr2f2-ChIP-Seq(GSE46497)                | 0            | 21.6        |
| HEB(bHLH)/mES-Heb-ChIP-Seq(GSE53233)                        | 0            | 31.6        |
| TEAD2(TEA)/Py2T-Tead2-ChIP-Seq(GSE55709)                    | 0            | 5.09        |
| Ascl1(bHLH)/NeuralTubes-Ascl1-ChIP-Seq(GSE55840)            | 0            | 26.3        |
| Tlx?(NR)/NPC-H3K4me1-ChIP-Seq(GSE16256)                     | 0            | 8.01        |
| Stat3+il21(Stat)/CD4-Stat3-ChIP-Seq(GSE19198)               | 0            | 8.31        |
| Fli1(ETS)/CD8-FLI-ChIP-Seq(GSE20898)                        | 0            | 17.2        |
| ZNF415(Zf)/HEK293-ZNF415.GFP-ChIP-Seq(GSE58341)             | 0            | 9.97        |
| CDX4(Homeobox)/ZebrafishEmbryos-Cdx4.Myc-ChIP-Seq(GSE48254) | 0            | 4.32        |
| SPDEF(ETS)/VCaP-SPDEF-ChIP-Seq(SRA014231)                   | 0            | 13.9        |
| REST-NRSF(Zf)/Jurkat-NRSF-ChIP-Seq                          | 0            | 0.45        |
| Cdx2(Homeobox)/mES-Cdx2-ChIP-Seq(GSE14586)                  | 0            | 2.88        |

|                                                                  |        |      |
|------------------------------------------------------------------|--------|------|
| Tgif2(Homeobox)/mES-Tgif2-ChIP-Seq(GSE55404)                     | 0      | 32.3 |
| FOXM1(Forkhead)/MCF7-FOXM1-ChIP-Seq(GSE72977)                    | 0      | 5.42 |
| Reverb(NR),DR2/RAW-Reverba.biotin-ChIP-Seq(GSE45914)             | 0      | 2.36 |
| MyoD(bHLH)/Myotube-MyoD-ChIP-Seq(GSE21614)                       | 0      | 14.2 |
| Phox2b(Homeobox)/CLBGA-PHOX2B-ChIP-Seq(GSE90683)                 | 0      | 0.66 |
| Nr5a2(NR)/mES-Nr5a2-ChIP-Seq(GSE19019)                           | 0      | 7.65 |
| Pitx1:Ebox(Homeobox,bHLH)/Hindlimb-Pitx1-ChIP-Seq(GSE41591)      | 0      | 1.18 |
| E2A(bHLH)/proBcell-E2A-ChIP-Seq(GSE21978)                        | 0      | 25.3 |
| Myf5(bHLH)/GM-Myf5-ChIP-Seq(GSE24852)                            | 0      | 11.6 |
| Nanog(Homeobox)/mES-Nanog-ChIP-Seq(GSE11724)                     | 0      | 37.2 |
| Atf7(bZIP)/3T3L1-Atf7-ChIP-Seq(GSE56872)                         | 0      | 4.84 |
| Foxf1(Forkhead)/Lung-Foxf1-ChIP-Seq(GSE77951)                    | 0      | 4.17 |
| THRb(NR)/Liver-NR1A2-ChIP-Seq(GSE52613)                          | 0      | 46.7 |
| FoxD3(forkhead)/ZebrafishEmbryo-Foxd3.biotin-ChIP-seq(GSE106676) | 0      | 4.71 |
| STAT4(Stat)/CD4-Stat4-ChIP-Seq(GSE22104)                         | 0      | 8.05 |
| FOXK2(Forkhead)/U2OS-FOXK2-ChIP-Seq(E-MTAB-2204)                 | 0      | 4.02 |
| Prop1(Homeobox)/GHFT1-PROP1.biotin-ChIP-Seq(GSE77302)            | 0      | 1.75 |
| EWS:FLI1-fusion(ETS)/SK_N_MC-EWS:FLI1-ChIP-Seq(SRA014231)        | 0      | 7.90 |
| Nr5a2(NR)/Pancreas-LRH1-ChIP-Seq(GSE34295)                       | 0      | 9.71 |
| Hoxa10(Homeobox)/ChickenMSG-Hoxa10.Flag-ChIP-Seq(GSE86088)       | 0      | 3.26 |
| Ascl2(bHLH)/ESC-Ascl2-ChIP-Seq(GSE97712)                         | 0      | 19.9 |
| AP-2alpha(AP2)/Hela-AP2alpha-ChIP-Seq(GSE31477)                  | 0      | 16.1 |
| Phox2a(Homeobox)/Neuron-Phox2a-ChIP-Seq(GSE31456)                | 0      | 1.14 |
| TEAD(TEA)/Fibroblast-PU.1-ChIP-Seq(Unpublished)                  | 0.0001 | 4.75 |
| TR4(NR),DR1/Hela-TR4-ChIP-Seq(GSE24685)                          | 0.0001 | 1.82 |
| PBX2(Homeobox)/K562-PBX2-ChIP-Seq(Encode)                        | 0.0001 | 4.53 |
| ZNF322(Zf)/HEK293-ZNF322.GFP-ChIP-Seq(GSE58341)                  | 0.0001 | 5.75 |
| Hoxd10(Homeobox)/ChickenMSG-Hoxd10.Flag-ChIP-Seq(GSE86088)       | 0.0001 | 6.71 |
| ETS(ETS)/Promoter                                                | 0.0001 | 6.28 |
| Foxo3(Forkhead)/U2OS-Foxo3-ChIP-Seq(E-MTAB-2701)                 | 0.0001 | 3.72 |
| ZBTB18(Zf)/HEK293-ZBTB18.GFP-ChIP-Seq(GSE58341)                  | 0.0003 | 6.68 |
| AP-2gamma(AP2)/MCF7-TFAP2C-ChIP-Seq(GSE21234)                    | 0.0003 | 20.4 |
| ETV1(ETS)/GIST48-ETV1-ChIP-Seq(GSE22441)                         | 0.0003 | 19.4 |
| THRb(NR)/HepG2-THRb.Flag-ChIP-Seq(Encode)                        | 0.0004 | 8.89 |
| Foxa2(Forkhead)/Liver-Foxa2-ChIP-Seq(GSE25694)                   | 0.0004 | 4.63 |
| ZNF416(Zf)/HEK293-ZNF416.GFP-ChIP-Seq(GSE58341)                  | 0.0004 | 20.1 |
| GATA(Zf),IR4/iTreg-Gata3-ChIP-Seq(GSE20898)                      | 0.0005 | 0.57 |
| FOXK1(Forkhead)/HEK293-FOXK1-ChIP-Seq(GSE51673)                  | 0.0006 | 5.21 |
| RARa(NR)/K562-RARa-ChIP-Seq(Encode)                              | 0.0006 | 29.2 |
| HOXA1(Homeobox)/mES-Hoxa1-ChIP-Seq(SRP084292)                    | 0.0006 | 1.93 |
| EBF(EBF)/proBcell-EBF-ChIP-Seq(GSE21978)                         | 0.0007 | 3.39 |
| RBPJ:Ebox(?,bHLH)/Panc1-Rbpj1-ChIP-Seq(GSE47459)                 | 0.0008 | 4.69 |
| Smad4(MAD)/ESC-SMAD4-ChIP-Seq(GSE29422)                          | 0.0015 | 21.6 |
| Pdx1(Homeobox)/Islet-Pdx1-ChIP-Seq(SRA008281)                    | 0.0015 | 4.84 |
| Hand2(bHLH)/Mesoderm-Hand2-ChIP-Seq(GSE61475)                    | 0.0015 | 5.50 |
| PGR(NR)/EndoStromal-PGR-ChIP-Seq(GSE69539)                       | 0.0016 | 1.60 |
| FOXP1(Forkhead)/H9-FOXP1-ChIP-Seq(GSE31006)                      | 0.0017 | 2.36 |
| Zic3(Zf)/mES-Zic3-ChIP-Seq(GSE37889)                             | 0.0017 | 11.1 |
| ERRg(NR)/Kidney-ESRRG-ChIP-Seq(GSE104905)                        | 0.0017 | 9.71 |
| STAT5(Stat)/mCD4+-Stat5-ChIP-Seq(GSE12346)                       | 0.0018 | 2.72 |
| HLF(bZIP)/HSC-HLF.Flag-ChIP-Seq(GSE69817)                        | 0.0021 | 3.74 |
| LEF1(HMG)/H1-LEF1-ChIP-Seq(GSE64758)                             | 0.0026 | 4.38 |
| Pit1+1bp(Homeobox)/GCrat-Pit1-ChIP-Seq(GSE58009)                 | 0.0026 | 1.03 |
| Hoxd11(Homeobox)/ChickenMSG-Hoxd11.Flag-ChIP-Seq(GSE86088)       | 0.0028 | 13.6 |
| Tcfcp2l1(CP2)/mES-Tcfcp2l1-ChIP-Seq(GSE11431)                    | 0.0031 | 2.61 |
| Esrrb(NR)/mES-Esrrb-ChIP-Seq(GSE11431)                           | 0.0034 | 7.14 |

|                                                                 |        |      |
|-----------------------------------------------------------------|--------|------|
| Nur77(NR)/K562-NR4A1-ChIP-Seq(GSE31363)                         | 0.0042 | 1.28 |
| HNF4a(NR),DR1/HepG2-HNF4a-ChIP-Seq(GSE25021)                    | 0.0044 | 5.14 |
| RAR:RXR(NR),DR5/ES-RAR-ChIP-Seq(GSE56893)                       | 0.0044 | 0.51 |
| HNF6(Homeobox)/Liver-Hnf6-ChIP-Seq(ERP000394)                   | 0.0047 | 2.84 |
| MafF(bZIP)/HepG2-MafF-ChIP-Seq(GSE31477)                        | 0.0056 | 1.34 |
| GLIS3(Zf)/Thyroid-Glis3.GFP-ChIP-Seq(GSE103297)                 | 0.0056 | 25.3 |
| HNF1b(Homeobox)/PDAC-HNF1B-ChIP-Seq(GSE64557)                   | 0.0057 | 0.46 |
| PAX5(Paired,Homeobox),condensed/GM12878-PAX5-ChIP-Seq(GSE32465) | 0.0059 | 1.69 |
| Unknown(Homeobox)/Limb-p300-ChIP-Seq                            | 0.0061 | 2.90 |
| Nkx6.1(Homeobox)/Islet-Nkx6.1-ChIP-Seq(GSE40975)                | 0.0061 | 12.5 |
| PPARE(NR),DR1/3T3L1-Pparg-ChIP-Seq(GSE13511)                    | 0.0061 | 11.4 |
| Bcl11a(Zf)/HSPC-BCL11A-ChIP-Seq(GSE104676)                      | 0.0064 | 8.74 |
| FXR(NR),IR1/Liver-FXR-ChIP-Seq(Chong_et_al.)                    | 0.0066 | 5.33 |
| PPARa(NR),DR1/Liver-Ppara-ChIP-Seq(GSE47954)                    | 0.0069 | 12.3 |
| c-Myc(bHLH)/LNCAP-cMyc-ChIP-Seq(Unpublished)                    | 0.008  | 6.62 |
| Fox:Ebox(Forkhead,bHLH)/Panc1-Foxa2-ChIP-Seq(GSE47459)          | 0.0091 | 7.26 |
| ZNF519(Zf)/HEK293-ZNF519.GFP-ChIP-Seq(GSE58341)                 | 0.0109 | 4.48 |
| Barx1(Homeobox)/Stomach-Barx1.3xFlag-ChIP-Seq(GSE69483)         | 0.0111 | 1.91 |
| Zac1(Zf)/Neuro2A-Plagl1-ChIP-Seq(GSE75942)                      | 0.0113 | 39.5 |
| Lhx2(Homeobox)/HFSC-Lhx2-ChIP-Seq(GSE48068)                     | 0.0113 | 4.83 |
| Mef2c(MADS)/GM12878-Mef2c-ChIP-Seq(GSE32465)                    | 0.0113 | 1.43 |
| MYB(HTH)/ERMYB-Myb-ChIPSeq(GSE22095)                            | 0.013  | 17.2 |
| Mouse_Recombination_Hotspot(Zf)/Testis-DMC1-ChIP-Seq(GSE24438)  | 0.0134 | 0.43 |
| RXR(NR),DR1/3T3L1-RXR-ChIP-Seq(GSE13511)                        | 0.0134 | 14.6 |
| Mef2d(MADS)/Retina-Mef2d-ChIP-Seq(GSE61391)                     | 0.014  | 0.78 |
| Bcl6(Zf)/Liver-Bcl6-ChIP-Seq(GSE31578)                          | 0.0168 | 12.3 |
| Zfp809(Zf)/ES-Zfp809-ChIP-Seq(GSE70799)                         | 0.0173 | 4.18 |
| Nkx2.5(Homeobox)/HL1-Nkx2.5.biotin-ChIP-Seq(GSE21529)           | 0.0197 | 21.7 |
| THRa(NR)/C17.2-THRa-ChIP-Seq(GSE38347)                          | 0.0204 | 5.45 |
| ERE(NR),IR3/MCF7-ERa-ChIP-Seq(Unpublished)                      | 0.0215 | 3.44 |
| Dlx3(Homeobox)/Kerainocytes-Dlx3-ChIP-Seq(GSE89884)             | 0.023  | 2.30 |
| Cux2(Homeobox)/Liver-Cux2-ChIP-Seq(GSE35985)                    | 0.0261 | 2.06 |
| OCT:OCT-short(POU,Homeobox)/NPC-OCT6-ChIP-Seq(GSE43916)         | 0.0281 | 2.26 |
| Oct6(POU,Homeobox)/NPC-Pou3f1-ChIP-Seq(GSE35496)                | 0.0292 | 1.82 |
| Pax8(Paired,Homeobox)/Thyroid-Pax8-ChIP-Seq(GSE26938)           | 0.0295 | 5.11 |
| Tgif1(Homeobox)/mES-Tgif1-ChIP-Seq(GSE55404)                    | 0.0297 | 27.1 |
| Atf2(bZIP)/3T3L1-Atf2-ChIP-Seq(GSE56872)                        | 0.0354 | 3.14 |
| CEBP:AP1(bZIP)/ThioMac-CEBPb-ChIP-Seq(GSE21512)                 | 0.0355 | 4.08 |
| Atf1(bZIP)/K562-ATF1-ChIP-Seq(GSE31477)                         | 0.0358 | 5.54 |
| HIF-1b(HLH)/T47D-HIF1b-ChIP-Seq(GSE59937)                       | 0.0359 | 13.2 |
| GLI3(Zf)/Limb-GLI3-ChIP-Chip(GSE11077)                          | 0.0384 | 2.14 |
| Hoxa9(Homeobox)/ChickenMSG-Hoxa9.Flag-ChIP-Seq(GSE86088)        | 0.0384 | 17.5 |
| GATA(Zf),IR3/iTreg-Gata3-ChIP-Seq(GSE20898)                     | 0.0421 | 0.73 |
| Twist(bHLH)/HMLE-TWIST1-ChIP-Seq(Chang_et_al)                   | 0.0448 | 1.87 |
| HOXB13(Homeobox)/ProstateTumor-HOXB13-ChIP-Seq(GSE56288)        | 0.0448 | 4.78 |
| CUX1(Homeobox)/K562-CUX1-ChIP-Seq(GSE92882)                     | 0.0459 | 2.81 |
| USF1(bHLH)/GM12878-Usf1-ChIP-Seq(GSE32465)                      | 0.0488 | 5.30 |

### Obese versus nonrestrictive LFD

| Motif name                           | q-val  | % TS |
|--------------------------------------|--------|------|
| p53(p53)/Saos-p53-ChIP-Seq(GSE15780) | 0.0015 | 8.70 |

Abbreviations: LFD, low-fat diet; MCR, Mediterranean-style calorie-restricted; q-val, Benjamini q-value; % TS, % of target sequences with motif.
