# Supplementary material
Source: PubMed Central journal article supplement (PMC9444913)
Supplement: NIHMS1817510-supplement-8.pdf [file NIHMS1817510-supplement-8.pdf]

**Table S3.** Overlapping differentially methylated regions for the obese versus LFCR and obese versus MCR comparisons

| <b>Gene</b> | <b>CpG site</b> | <b>Feature</b>       | <b>Relation to UCSC CpG Island</b> | <b>Obese % methyl</b> | <b>LFCR % methyl</b> | <b>MCR % methyl</b> | <b>Ob vs LFCR q-value</b> | <b>Ob vs MCR q-value</b> |
|-------------|-----------------|----------------------|------------------------------------|-----------------------|----------------------|---------------------|---------------------------|--------------------------|
| Trim67      | chr8_124828691  | Body                 | Open sea                           | 100                   | 83.6                 | 80.4                | 0.033                     | 0.011                    |
| Tcf15       | chr2_180642613  | 1 <sup>st</sup> exon | Island                             | 34.0                  | 9.2                  | 12.7                | 0.021                     | 0.0047                   |
| Srebf1      | chr11_60203552  | Body                 | Open sea                           | 91.8                  | 59.0                 | 56.6                | 0.019                     | 5.4x10 <sup>-4</sup>     |
| Tm6sf1      | chr7_81863233   | 5'UTR                | Shelf                              | 10.9                  | 31.7                 | 36.3                | 0.030                     | 0.0089                   |
| St3gal5     | chr6_72097819   | 1 <sup>st</sup> exon | Island                             | 0                     | 36.5                 | 44.9                | 1.46x10 <sup>-8</sup>     | 7.92 x10 <sup>-6</sup>   |
| Lmf1        | chr17_25648079  | Body                 | Open sea                           | 18                    | 36.1                 | 35.0                | 0.021                     | 0.011                    |

Differentially methylated regions were assessed via reduced representation bisulfite sequencing in a subset of normal mammary tissue samples, distal to tumor, with n=4 in the Obese and LFCR groups, n=3 in the MCR group. Abbreviations: LFCR, low-fat calorie-restricted; MCR, Mediterranean-style calorie restricted; methyl, methylation; Ob, obese; UCSC, University of California at Santa Cruz
